# Supplementary material for: In situ formation of biocompatible and ductile protein-based hydrogels via Michael addition reaction and visible light crosslinking
Source: Royal Society of Chemistry journal article supplement (doi:10.1039/d3nj01230a), 2023-01-01
Supplement: d3nj01230a1.pdf [file d3nj01230a1.pdf]

Rumeysa Tutar<sup>a\*</sup>, Simay Yagmur Koken<sup>a</sup>, Betül Çelebi Saltık<sup>b</sup>, Deniz Ceylan Tuncaboylu<sup>c</sup>, Cemal Özeroğlu<sup>a</sup>

<sup>a</sup>Department of Chemistry, Faculty of Engineering, Istanbul University-Cerrahpasa, Avcılar, Istanbul, 34320, Turkey

<sup>b</sup>Department of Stem Cell Sciences, Hacettepe University Graduate School of Health Sciences, Center for Stem Cell Research and Development, Ankara, 06100, Turkey

<sup>c</sup>Bezmialem Vakif University, Faculty of Pharmacy, 34093 Istanbul, Turkey

Corresponding Author: \* [rumeysa.tutar@iuc.edu.tr](mailto:rumeysa.tutar@iuc.edu.tr)

Characterization of Extracted Keratin:

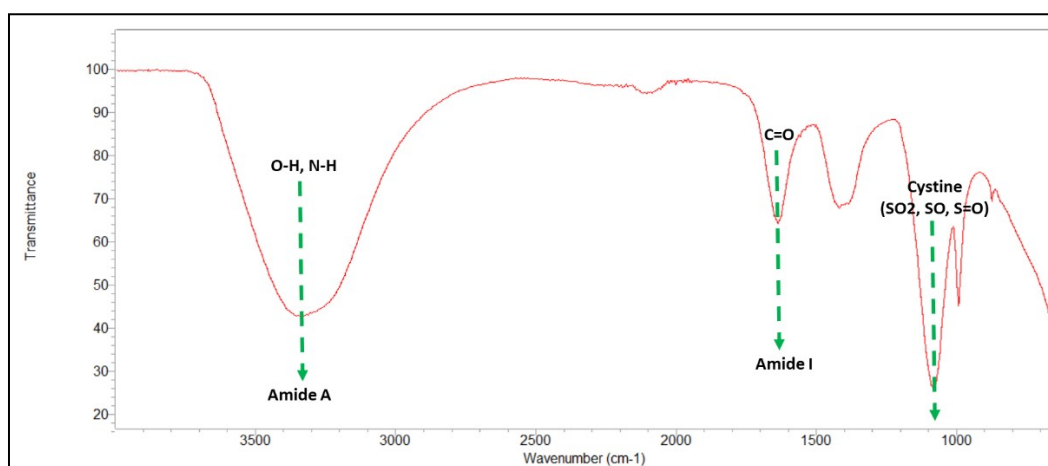

**Fig. 1** FTIR analysis of the material remaining on the filter paper after the reaction.

Because of our optimized reduced human hair method, remaining materials on the filter paper after the reaction were also identified to show our method efficiency. When compared with the FTIR result obtained after the reaction, it is seen that there are no Amide II and Amide III peaks. In addition, there was not peak for -C-H<sub>2</sub>, -C-H<sub>3</sub> which is observed around 2900 cm<sup>-1</sup>.

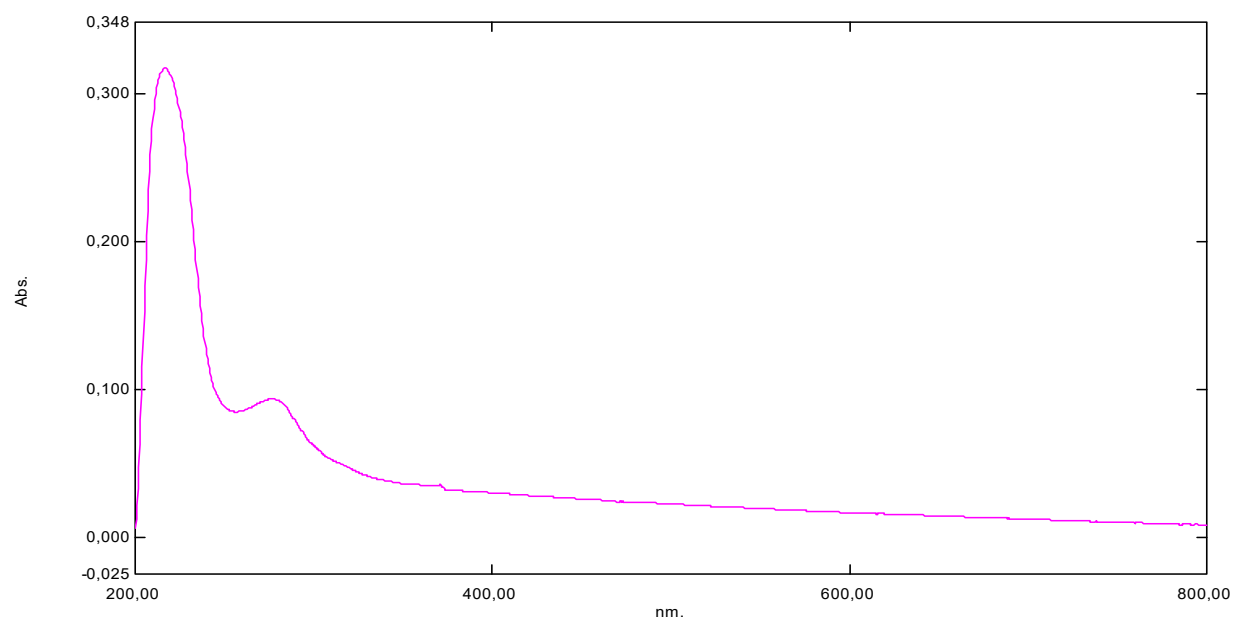

**Fig. 2** UV-Vis spectra of extracted keratin from human hair.

When the UV-Vis spectra in -Fig. S2 was examined, the absorbance of the aromatic ring reported in the literature was seen around 276 nm. It confirmed that the presence of chromophores at amino acid residues such as tyrosine observed at 268 nm in the spectra. Tyrosine is one of the few amino acids found in UV active keratin and despite its moderate abundance in the amino acid sequence, it is possible to observe the absorption band significantly above the almost flat baseline for larger wavelengths.
